# Supplementary material for: Study on the Active Constituents and Molecular Mechanism of Zhishi Xiebai Guizhi Decoction in the Treatment of CHD Based on UPLC-UESI-Q Exactive Focus, Gene Expression Profiling, Network Pharmacology, and Experimental Validation
Source: PubMed Central journal article supplement — ACS Omega. 2022 Jan 28;7(5):3925–39. doi: 10.1021/acsomega.1c04491 (PMC8829943; doi:10.1021/acsomega.1c04491), 2022-01-28
Supplement: ao1c04491_si_001.pdf [file ao1c04491_si_001.pdf]

**Study on the active constituents and molecular mechanism of Zhishi Xiebai  
Guizhi decoction (ZXGD) in the treatment of CHD based on UPLC-UESI-Q  
Exactive Focus, gene expression profiling, network pharmacology and  
experimental validation**

Yuan Liu<sup>a,#</sup>, Xu He<sup>b,#</sup>, Zhibiao Di<sup>a,#</sup>, Xia Du<sup>a,c,\*</sup>

<sup>a</sup> Institute of Traditional Chinese Medicine, Shaanxi Academy of Traditional Chinese Medicine, Xi'an, Shaanxi, 710003, China

<sup>b</sup> Department of The First Clinical Medical College, Shaanxi University of Chinese Medicine, Xianyang, 711301, China

<sup>c</sup> Institute of Chinese Materia Medica, China Academy of Chinese Medical Sciences, Beijing 100700, China

<sup>#</sup> These authors have contributed equally to this work

<sup>\*</sup> Corresponding author

E-mail address: duxia\_0601 @163.com

**Table S1: Identification of chemical constituents of TTN by UPLC-UESI-Q Exactive Focus**

| No. | Compound Name                      | +/- | Area     | RT<br>(time) | Formula   | Expected<br>(m/z) | Measured<br>(m/z) | Delta<br>(m/z) | Source                                              |
|-----|------------------------------------|-----|----------|--------------|-----------|-------------------|-------------------|----------------|-----------------------------------------------------|
| 1   | lauric acid                        | +   | 9.37E+04 | 0.19         | C12H24O2  | 201.1849          | 201.1849          | -0.25          | Trichosanthis fructus                               |
| 2   | pentadecanoic acid                 | +   | 4.55E+05 | 0.87         | C15H30O2  | 243.2319          | 243.232           | 0.68           | Trichosanthis fructus                               |
| 3   | lysine                             | +   | 1.59E+07 | 0.9          | C6H14N2O2 | 147.1128          | 147.1127          | -0.36          | Trichosanthis fructus                               |
| 4   | aspartic acid                      | +   | 4.34E+07 | 0.94         | C4H7NO4   | 134.0448          | 134.0447          | -0.88          | Trichosanthis fructus/Allii macrostemonis<br>bulbus |
| 5   | histidine                          | +   | 3.16E+07 | 0.94         | C6H9N3O2  | 156.0768          | 156.0766          | -0.97          | Trichosanthis fructus                               |
| 6   | galactonic acid- $\gamma$ -lactone | +   | 1.58E+07 | 0.97         | C6H10O6   | 179.055           | 179.0547          | -1.89          | Trichosanthis fructus                               |
| 7   | glutamic acid                      | +   | 4.04E+07 | 0.97         | C5H9NO4   | 148.0604          | 148.0602          | -1.27          | Trichosanthis fructus                               |
| 8   | L-threonine                        | +   | 1.44E+06 | 0.97         | C4H9NO3   | 120.0655          | 120.0656          | 0.58           | Trichosanthis fructus/Allii macrostemonis<br>bulbus |
| 9   | L-rhamnose monohydrate             | +   | 1.80E+07 | 0.97         | C6H12O5   | 165.0758          | 165.0756          | -1.05          | Magnoliae officinalis cortex                        |
| 10  | allose                             | -   | 1.76E+08 | 0.98         | C6H12O6   | 179.0561          | 179.0554          | -3.77          | Magnoliae officinalis cortex                        |

|    |                             |   |          |      |            |          |          |       |                                                            |
|----|-----------------------------|---|----------|------|------------|----------|----------|-------|------------------------------------------------------------|
| 11 | glucose                     | - | 1.76E+08 | 0.98 | C6H12O6    | 179.0561 | 179.0554 | -3.77 | Magnoliae officinalis cortex/Allii<br>macrostemonis bulbus |
| 12 | 3,4-Dihydroxybenzaldehyde   | + | 5.64E+06 | 0.99 | C7H6O3     | 139.039  | 139.0388 | -0.98 | Cinnamomi ramulus                                          |
| 13 | p-Hydroxybenzoic acid       | + | 5.64E+06 | 0.99 | C7H6O3     | 139.039  | 139.0388 | -0.98 | Allii macrostemonis bulbus                                 |
| 14 | methyl-β-D-fructofuranoside | - | 1.08E+06 | 1    | C7H14O6    | 193.0718 | 193.0712 | -2.83 | Allii macrostemonis bulbus                                 |
| 15 | quinic acid                 | - | 9.82E+08 | 1    | C7H12O6    | 191.0561 | 191.0555 | -3.21 | Aurantii fructus immaturus                                 |
| 16 | 6-isoinosine                | - | 2.90E+06 | 1.03 | C10H12N4O5 | 267.0735 | 267.0723 | -4.36 | Trichosanthis fructus                                      |
| 17 | cytidine                    | + | 1.92E+07 | 1.04 | C9H13N3O5  | 244.0928 | 244.0925 | -1.3  | Trichosanthis fructus                                      |
| 18 | scopoletin                  | + | 2.76E+06 | 1.04 | C10H8O4    | 193.0495 | 193.0496 | 0.19  | Aurantii fructus immaturus                                 |
| 19 | adenine                     | + | 3.60E+07 | 1.06 | C5H5N5     | 136.0618 | 136.062  | 1.89  | Trichosanthis fructus                                      |

**Continued Table S1: Identification of chemical constituents of TTN by UPLC-UESI-Q Exactive Focus**

| No. | Compound Name           | +/- | Area     | RT<br>(time) | Formula | Expected<br>(m/z) | Measured<br>(m/z) | Delta<br>(m/z) | Source            |
|-----|-------------------------|-----|----------|--------------|---------|-------------------|-------------------|----------------|-------------------|
| 20  | 3-Hydroxy-ben-zaldehyde | +   | 1.84E+07 | 1.06         | C7H6O2  | 123.0441          | 123.044           | -0.13          | Cinnamomi ramulus |

|    |                    |   |          |      |           |          |          |       |                                                                         |
|----|--------------------|---|----------|------|-----------|----------|----------|-------|-------------------------------------------------------------------------|
| 21 | benzoic Acid       | + | 1.84E+07 | 1.06 | C6H5COOH  | 123.0441 | 123.044  | -0.13 | Cinnamomi ramulus/Aurantii fructus<br>immaturus                         |
| 22 | magnosprengerine   | + | 2.56E+07 | 1.06 | C11H17NO2 | 196.1332 | 196.1331 | -0.7  | Magnoliae officinalis cortex                                            |
| 23 | synephrine         | + | 3.42E+08 | 1.06 | C9H13NO2  | 168.1019 | 168.1017 | -1.16 | Aurantii fructus immaturus                                              |
| 24 | heptadecanoic acid | + | 9.06E+06 | 1.09 | C17H34O2  | 271.2632 | 271.2625 | -2.28 | Trichosanthis fructus/Cinnamomi ramulus                                 |
| 25 | isovanillic Acid   | + | 1.06E+06 | 1.09 | C8H8O4    | 169.0495 | 169.0496 | 0.12  | Trichosanthis fructus/Cinnamomi<br>ramulus/Magnoliae officinalis cortex |
| 26 | quercitrin         | - | 5.28E+05 | 1.1  | C21H20O11 | 447.0933 | 447.0952 | 4.26  | Trichosanthis fructus/Magnoliae officinalis<br>cortex                   |
| 27 | DL-methionine      | + | 2.26E+06 | 1.24 | C5H11NO2S | 150.0583 | 150.0585 | 1.05  | Trichosanthis fructus                                                   |
| 28 | capric acid        | + | 6.54E+05 | 1.26 | C10H20O2  | 173.1536 | 173.1534 | -1.06 | Trichosanthis fructus                                                   |
| 29 | nicotinic acid     | + | 9.29E+06 | 1.26 | C6H5NO2   | 124.0393 | 124.0394 | 0.67  | Trichosanthis fructus                                                   |
| 30 | nonanoic acid      | + | 7.73E+05 | 1.36 | C9H18O2   | 159.138  | 159.1379 | -0.23 | Trichosanthis fructus                                                   |
| 31 | pyroglutamic acid  | + | 7.95E+07 | 1.39 | C5H7NO3   | 130.0499 | 130.05   | 0.67  | Trichosanthis fructus                                                   |
| 32 | octanoic acid      | + | 1.59E+05 | 1.39 | C8H16O2   | 145.1223 | 145.1222 | -0.5  | Trichosanthis fructus                                                   |

|    |                         |   |          |      |           |          |          |       |                              |
|----|-------------------------|---|----------|------|-----------|----------|----------|-------|------------------------------|
| 33 | hypoxanthine            | + | 6.69E+06 | 1.41 | C5H4N4O   | 137.0458 | 137.0458 | -0.1  | Trichosanthis fructus        |
| 34 | 4-hydroxynicotinic acid | + | 6.04E+06 | 1.47 | C6H5NO3   | 140.0342 | 140.0342 | -0.18 | Trichosanthis fructus        |
| 35 | phlorin                 | - | 4.95E+07 | 1.48 | C12H16O8  | 287.0772 | 287.0777 | 1.7   | Aurantii fructus immaturus   |
| 36 | terpinen-4-ol           | + | 5.07E+05 | 1.51 | C10H18O   | 155.143  | 155.1431 | 0.17  | Cinnamomi ramulus            |
| 37 | uridine                 | - | 3.85E+07 | 1.55 | C9H12N2O6 | 243.0623 | 243.0624 | 0.42  | Magnoliae officinalis cortex |
| 38 | myristic acid           | + | 8.11E+04 | 1.67 | C14H28O2  | 229.2162 | 229.2164 | 0.96  | Trichosanthis fructus        |

**Continued Table S1: Identification of chemical constituents of TTN by UPLC-UESI-Q Exactive Focus**

| No. | Compound Name    | +/- | Area     | RT<br>(time) | Formula    | Expected<br>(m/z) | Measured<br>(m/z) | Delta<br>(m/z) | Source                     |
|-----|------------------|-----|----------|--------------|------------|-------------------|-------------------|----------------|----------------------------|
| 39  | tyrosine         | +   | 6.17E+07 | 1.75         | C9H11NO3   | 182.0812          | 182.0812          | 0.04           | Trichosanthis fructus      |
| 40  | leucine          | +   | 1.04E+08 | 1.75         | C6H13NO2   | 132.1019          | 132.102           | 0.37           | Trichosanthis fructus      |
| 41  | N-methyltyramine | +   | 1.37E+08 | 2.03         | C9H13NO    | 152.107           | 152.107           | 0.03           | Aurantii fructus immaturus |
| 42  | adenosine        | +   | 1.30E+08 | 2.18         | C10H13N5O4 | 268.104           | 268.1038          | -1.01          | Trichosanthis fructus      |
| 43  | guanosine        | +   | 4.40E+07 | 2.46         | C10H13N5O5 | 284.099           | 284.0989          | -0.15          | Allii macrostemonis bulbus |

|    |                                                              |   |          |      |            |          |          |       |                                         |
|----|--------------------------------------------------------------|---|----------|------|------------|----------|----------|-------|-----------------------------------------|
| 44 | Phenylalanine                                                | + | 1.46E+08 | 3.03 | C9H11NO2   | 166.0863 | 166.0862 | -0.47 | Trichosanthis fructus                   |
| 45 | Thymidine                                                    | - | 4.32E+06 | 3.43 | C10H14N2O5 | 241.083  | 241.0831 | 0.33  | Allii macrostemonis bulbus              |
| 46 | quercetin-3-O-β-rutinoside                                   | + | 1.27E+06 | 3.72 | C27H30O16  | 611.1607 | 611.1577 | -4.82 | Trichosanthis fructus                   |
| 47 | Protocatechuicacid                                           | - | 1.06E+07 | 4.12 | C7H6O4     | 153.0193 | 153.0186 | -4.97 | Cinnamomi ramulus                       |
| 48 | benzyl benzoate                                              | + | 1.34E+06 | 4.29 | C14H12O2   | 213.091  | 213.0909 | -0.46 | Cinnamomi ramulus                       |
| 49 | magnolianone                                                 | + | 2.46E+05 | 4.36 | C19H22O6   | 347.1489 | 347.1492 | 0.84  | Magnoliae officinalis cortex            |
| 50 | Meranzin hydrate                                             | + | 3.23E+04 | 4.36 | C15H18O5   | 279.1227 | 279.1217 | -3.68 | Aurantii fructus immaturus              |
| 51 | 4-(beta-D-glucopyranosyloxy)-3-methoxybenzoic acid           | - | 1.15E+07 | 4.45 | C14H18O9   | 329.0878 | 329.0883 | 1.45  | Trichosanthis fructus                   |
| 52 | syringin                                                     | + | 1.02E+05 | 4.8  | C17H24O9   | 373.1493 | 373.1477 | -4.38 | Magnoliae officinalis cortex            |
| 53 | indole-3-aldehyde                                            | + | 4.06E+06 | 5    | C9H7NO     | 146.06   | 146.0601 | 0.13  | Magnoliae officinalis cortex            |
| 54 | tryptophan                                                   | + | 3.48E+07 | 5.02 | C11H12N2O2 | 205.0972 | 205.0971 | -0.28 | Allii macrostemonis bulbus              |
| 55 | ethyl-3-methyl-4, 5, 6, 7-tetrahydro-1H-indole-2-carboxylate | + | 1.31E+06 | 5.07 | C12H17NO2  | 208.1332 | 208.1332 | 0.14  | Trichosanthis fructus                   |
| 56 | syringic acid                                                | - | 1.43E+06 | 5.69 | C9H10O5    | 197.0456 | 197.0452 | -1.56 | Cinnamomi ramulus/Magnoliae officinalis |

cortex

|    |                       |   |          |      |           |          |          |      |                            |
|----|-----------------------|---|----------|------|-----------|----------|----------|------|----------------------------|
| 57 | N-p-coumaroyltyramine | + | 3.97E+05 | 5.83 | C17H17NO3 | 284.1281 | 284.1278 | -1.1 | Allii macrostemonis bulbus |
|----|-----------------------|---|----------|------|-----------|----------|----------|------|----------------------------|

**Continued Table S1: Identification of chemical constituents of TTN by UPLC-UESI-Q Exactive Focus**

| No. | Compound Name                                                   | +/- | Area     | RT<br>(time) | Formula    | Expected<br>(m/z) | Measured<br>(m/z) | Delta<br>(m/z) | Source                       |
|-----|-----------------------------------------------------------------|-----|----------|--------------|------------|-------------------|-------------------|----------------|------------------------------|
| 58  | 3, 4, 5-trimethoxyphenyl β-D-glucopy ranoside                   | +   | 4.91E+04 | 5.94         | C18H26O9   | 387.165           | 387.1637          | -3.26          | Magnoliae officinalis cortex |
| 59  | 2, 3, 4, 9-tetrahydro-1H pyrido[3, 4-b]indole-3-carboxylic acid | +   | 8.85E+06 | 6.04         | C12H12N2O2 | 217.0972          | 217.097           | -0.76          | Trichosanthis fructus        |
| 60  | 4'-methoxymagnaldehyde E                                        | +   | 6.42E+05 | 6.06         | C17H16O3   | 269.1172          | 269.1169          | -1.14          | Magnoliae officinalis cortex |
| 61  | (2R,3S,4S,5R)-2-butoxy-2,5-bis(hydroxymethyl)oxolane-3,4-diol   | +   | 1.03E+05 | 6.37         | C10H20O6   | 237.1333          | 237.1343          | 4.29           | Trichosanthis fructus        |
| 62  | N-trans-feruloyltyramine                                        | +   | 4.56E+06 | 6.45         | C18H19NO4  | 314.1387          | 314.1385          | -0.51          | Allii macrostemonis bulbus   |
| 63  | trans-N-feruloylputrescine                                      | +   | 6.90E+07 | 6.55         | C14H20N2O3 | 265.1547          | 265.1543          | -1.29          | Magnoliae officinalis cortex |
| 64  | Trihydroxy-tetramethoxy-flavone                                 | -   | 2.47E+05 | 6.61         | C19H18O9   | 389.0878          | 389.086           | -4.73          | Aurantii fructus immaturus   |
| 65  | ethyl benzoate                                                  | +   | 8.84E+06 | 6.65         | C9H10O2    | 151.0754          | 151.0753          | -0.38          | Cinnamomi ramulus            |

|    |                                                        |   |          |      |           |          |          |       |                                                |
|----|--------------------------------------------------------|---|----------|------|-----------|----------|----------|-------|------------------------------------------------|
| 66 | chlorogenic Acid                                       | - | 3.74E+07 | 6.94 | C16H18O9  | 353.0878 | 353.0881 | 0.83  | Magnoliae officinalis cortex                   |
| 67 | 4-( 2-formyl-5-hydroxy methylpyrrol-1-yl)-butyric acid | - | 3.07E+06 | 7.07 | C10H13NO4 | 210.0772 | 210.077  | -0.95 | Trichosanthis fructus                          |
| 68 | cucurbitacin B                                         | + | 5.24E+05 | 7.21 | C32H46O8  | 559.3265 | 559.3265 | 0     | Trichosanthis fructus                          |
| 69 | caffeicacid                                            | - | 3.18E+07 | 7.24 | C9H8O4    | 179.035  | 179.0344 | -3.19 | Magnoliae officinalis cortex                   |
| 70 | pinoresionol-4-O-β-D-glucopyranoside                   | + | 1.02E+06 | 7.87 | C26H32O11 | 521.2017 | 521.2016 | -0.27 | Magnoliae officinalis cortex                   |
| 71 | reticuline                                             | + | 3.20E+07 | 7.92 | C19H23NO4 | 330.17   | 330.1696 | -1.1  | Magnoliae officinalis cortex                   |
| 72 | syringaldehyde                                         | + | 6.98E+06 | 8.35 | C9H10O4   | 183.0652 | 183.0653 | 0.48  | Cinnamomi ramulus/Magnoliae officinalis cortex |
| 73 | 5, 7-Dihydroxycoumarin                                 | - | 1.83E+07 | 8.44 | C9H6O4    | 177.0193 | 177.0187 | -3.43 | Aurantii fructus immaturus                     |
| 74 | sinapic Acid                                           | - | 2.79E+05 | 8.57 | C11H12O5  | 223.0612 | 223.061  | -0.81 | Magnoliae officinalis cortex                   |
| 75 | acteoside                                              | - | 3.99E+08 | 8.62 | C29H36O15 | 623.1981 | 623.1985 | 0.56  | Magnoliae officinalis cortex                   |

**Continued Table S1: Identification of chemical constituents of TTN by UPLC-UESI-Q Exactive Focus**

| No. | Compound Name | +/- | Area | RT<br>(time) | Formula | Expected<br>(m/z) | Measured<br>(m/z) | Delta<br>(m/z) | Source |
|-----|---------------|-----|------|--------------|---------|-------------------|-------------------|----------------|--------|
|-----|---------------|-----|------|--------------|---------|-------------------|-------------------|----------------|--------|

|    |                                     |   |          |      |           |          |          |       |                              |
|----|-------------------------------------|---|----------|------|-----------|----------|----------|-------|------------------------------|
| 76 | coniferol alcohol                   | + | 1.79E+06 | 8.63 | C10H12O3  | 181.0859 | 181.0861 | 0.94  | Magnoliae officinalis cortex |
| 77 | umbelliferone                       | + | 7.34E+07 | 8.63 | C9H6O3    | 163.039  | 163.0388 | -1.3  | Aurantii fructus immaturus   |
| 78 | kaempferol-3-O- $\beta$ -rutinoside | - | 4.55E+07 | 8.67 | C27H30O15 | 593.1512 | 593.1514 | 0.4   | Trichosanthis fructus        |
| 79 | lonicerin                           | - | 4.55E+07 | 8.67 | C27H30O15 | 593.1512 | 593.1514 | 0.4   | Aurantii fructus immaturus   |
| 80 | S-(+)-dehydrovomifoliol             | + | 1.15E+06 | 8.71 | C13H18O3  | 223.1329 | 223.1329 | 0.15  | Magnoliae officinalis cortex |
| 81 | coniferin                           | - | 5.63E+05 | 8.82 | C16H22O8  | 341.1242 | 341.1246 | 1.12  | Magnoliae officinalis cortex |
| 82 | p-Hydroxy-cinnamic acid             | - | 2.60E+07 | 8.97 | C9H8O3    | 163.0401 | 163.0393 | -4.59 | Allii macrostemonis bulbus   |
| 83 | (+) -lyoniresinol                   | - | 3.77E+05 | 9.02 | C22H28O8  | 419.1711 | 419.1713 | 0.44  | Cinnamomi ramulus            |
| 84 | acanthoside D                       | - | 6.41E+05 | 9.13 | C34H46O18 | 741.2611 | 741.2614 | 0.29  | Allii macrostemonis bulbus   |
| 85 | lariciresinol                       | - | 3.81E+06 | 9.28 | C20H24O6  | 359.15   | 359.1503 | 0.72  | Magnoliae officinalis cortex |
| 86 | limonexin                           | + | 1.35E+06 | 9.34 | C26H30O10 | 503.1912 | 503.1887 | -4.87 | Aurantii fructus immaturus   |
| 87 | (-)-Loliolide                       | + | 1.18E+07 | 9.37 | C11H16O3  | 197.1172 | 197.1172 | 0.14  | Trichosanthis fructus        |
| 88 | loliolide                           | + | 1.18E+07 | 9.37 | C11H16O3  | 197.1172 | 197.1172 | 0.14  | Magnoliae officinalis cortex |
| 89 | cinnamic acid                       | + | 1.52E+06 | 9.39 | C9H8O2    | 149.0597 | 149.0597 | 0.19  | Magnoliae officinalis cortex |

|    |                                                         |   |          |      |           |          |          |       |                              |
|----|---------------------------------------------------------|---|----------|------|-----------|----------|----------|-------|------------------------------|
| 90 | asimilobine                                             | + | 1.39E+08 | 9.44 | C17H17NO2 | 268.1332 | 268.1328 | -1.48 | Magnoliae officinalis cortex |
| 91 | cinnamyl Acetate                                        | + | 3.39E+06 | 9.54 | C11H12O2  | 177.091  | 177.091  | -0.12 | Magnoliae officinalis cortex |
| 92 | (-) -secoisolariciresinol                               | - | 1.21E+06 | 9.55 | C20H26O6  | 361.1657 | 361.1653 | -0.96 | Cinnamomi ramulus            |
| 93 | methylcaffeate                                          | - | 1.08E+07 | 9.55 | C10H10O4  | 193.0506 | 193.0502 | -2.22 | Magnoliae officinalis cortex |
| 94 | sinapaldehyde                                           | + | 5.59E+06 | 9.57 | C11H12O4  | 209.0808 | 209.0808 | 0.01  | Cinnamomi ramulus            |
| 95 | ( E) -3-( 4-Hydroxy-3, 5-Di methoxyphenyl)acrylaldehyde | + | 5.59E+06 | 9.57 | C11H12O4  | 209.0808 | 209.0808 | 0.01  | Magnoliae officinalis cortex |
| 96 | tricin                                                  | + | 1.11E+06 | 9.79 | C17H14O7  | 331.0812 | 331.0807 | -1.45 | Trichosanthis fructus        |

**Continued Table S1: Identification of chemical constituents of TTN by UPLC-UESI-Q Exactive Focus**

| No. | Compound Name | +/- | Area     | RT<br>(time) | Formula   | Expected<br>(m/z) | Measured<br>(m/z) | Delta<br>(m/z) | Source                       |
|-----|---------------|-----|----------|--------------|-----------|-------------------|-------------------|----------------|------------------------------|
| 97  | afzelin       | +   | 9.99E+05 | 9.79         | C21H20O10 | 433.1129          | 433.1124          | -1.21          | Magnoliae officinalis cortex |
| 98  | eriodictyol   | +   | 8.50E+07 | 9.79         | C15H12O6  | 289.0707          | 289.0703          | -1.1           | Aurantii fructus immaturus   |
| 99  | isovitexin    | +   | 9.99E+05 | 9.79         | C21H20O10 | 433.1129          | 433.1124          | -1.21          | Aurantii fructus immaturus   |

|     |                                                                              |   |          |       |           |          |          |       |                              |
|-----|------------------------------------------------------------------------------|---|----------|-------|-----------|----------|----------|-------|------------------------------|
| 100 | eriocitrin                                                                   | - | 4.04E+08 | 9.81  | C27H32O15 | 595.1668 | 595.1672 | 0.56  | Aurantii fructus immaturus   |
| 101 | manglieside D                                                                | - | 3.17E+06 | 9.93  | C26H34O11 | 521.2028 | 521.2032 | 0.8   | Magnoliae officinalis cortex |
| 102 | icaraside E5                                                                 | - | 3.17E+06 | 9.93  | C26H34O11 | 521.2028 | 521.2032 | 0.8   | Magnoliae officinalis cortex |
| 103 | coniferaldehyde                                                              | + | 1.11E+07 | 9.94  | C10H10O3  | 179.0703 | 179.0702 | -0.19 | Magnoliae officinalis cortex |
| 104 | kaempferol-3-O- $\beta$ -D-glucoside-7-O- $\alpha$ -rhamnoside               | - | 4.38E+05 | 10.24 | C33H40O20 | 755.204  | 755.2007 | -4.34 | Trichosanthis fructus        |
| 105 | seselin                                                                      | + | 3.58E+05 | 10.35 | C14H12O3  | 229.0859 | 229.0861 | 0.74  | Aurantii fructus immaturus   |
| 106 | coumarin                                                                     | + | 2.14E+08 | 10.43 | C9H6O2    | 147.0441 | 147.044  | -0.16 | Cinnamomi ramulus            |
| 107 | quercetin-3-O- $\alpha$ -D-nucleoside                                        | - | 3.19E+05 | 10.45 | C20H18O11 | 433.0776 | 433.0786 | 2.2   | Trichosanthis fructus        |
| 108 | syringaresinol-4'-O- $\beta$ -D-glucopyranoside                              | - | 1.36E+07 | 10.5  | C28H36O13 | 579.2083 | 579.2061 | -3.79 | Magnoliae officinalis cortex |
| 109 | lirioresinol A                                                               | + | 2.21E+06 | 10.51 | C22H26O8  | 419.17   | 419.1696 | -1.01 | Magnoliae officinalis cortex |
| 110 | D-apiose                                                                     | - | 2.26E+06 | 10.52 | C5H10O5   | 149.0456 | 149.046  | 3.26  | Magnoliae officinalis cortex |
| 111 | L-Arabinose                                                                  | - | 2.26E+06 | 10.52 | C5H10O5   | 149.0456 | 149.046  | 3.26  | Allii macrostemonis bulbus   |
| 112 | apigenin-6,8-C- $\beta$ -glucoside                                           | - | 4.88E+05 | 10.59 | C26H28O14 | 563.1406 | 563.1421 | 2.59  | Trichosanthis fructus        |
| 113 | 2,7-dimethyl-2,4-diene deca- $\alpha$ , $\omega$ -diacid-8-O- $\beta$ -D-glu | - | 1.30E+07 | 10.59 | C18H28O10 | 403.161  | 403.1611 | 0.4   | Trichosanthis fructus        |

|     |                           |   |          |       |           |          |          |       |                              |
|-----|---------------------------|---|----------|-------|-----------|----------|----------|-------|------------------------------|
| 114 | 2-isopropylphenol         | + | 3.48E+05 | 10.61 | C9H12O    | 137.0961 | 137.096  | -0.71 | Magnoliae officinalis cortex |
| 115 | choerospondin             | + | 8.35E+07 | 10.81 | C21H22O10 | 435.1286 | 435.1279 | -1.61 | Magnoliae officinalis cortex |
| 116 | puerarin                  | + | 9.78E+06 | 10.81 | C21H20O9  | 417.118  | 417.1172 | -1.9  | Aurantii fructus immaturus   |
| 117 | prunin                    | + | 8.35E+07 | 10.81 | C21H22O10 | 435.1286 | 435.1279 | -1.61 | Aurantii fructus immaturus   |
| 118 | natsudaïdai, natsu-daïdai | + | 7.99E+07 | 10.81 | C21H22O9  | 419.1337 | 419.1329 | -1.88 | Aurantii fructus immaturus   |

**Continued Table S1: Identification of chemical constituents of TTN by UPLC-UESI-Q Exactive Focus**

| No. | Compound Name                              | +/- | Area     | RT<br>(time) | Formula   | Expected<br>(m/z) | Measured<br>(m/z) | Delta<br>(m/z) | Source                       |
|-----|--------------------------------------------|-----|----------|--------------|-----------|-------------------|-------------------|----------------|------------------------------|
| 119 | naringenin-7-O- $\beta$ -D-glucopyranoside | +   | 1.16E+07 | 10.81        | C33H42O18 | 727.2444          | 727.2427          | -2.27          | Aurantii fructus immaturus   |
| 120 | naringin                                   | -   | 2.46E+09 | 10.82        | C27H32O14 | 579.1719          | 579.1721          | 0.22           | Aurantii fructus immaturus   |
| 121 | michealbine                                | +   | 4.39E+05 | 11.01        | C17H15NO3 | 282.1125          | 282.1124          | -0.26          | Magnoliae officinalis cortex |
| 122 | phellopterin                               | -   | 1.10E+06 | 11.05        | C17H16O5  | 299.0925          | 299.0929          | 1.32           | Aurantii fructus immaturus   |
| 123 | honokitriol                                | -   | 6.41E+06 | 11.27        | C18H20O5  | 315.1238          | 315.1241          | 1              | Magnoliae officinalis cortex |
| 124 | quercetin-3-O- $\beta$ -D-glucofuranoside  | -   | 5.13E+05 | 11.29        | C21H20O12 | 463.0882          | 463.0883          | 0.25           | Trichosanthis fructus        |

|     |                                              |   |          |       |           |          |          |       |                                                |
|-----|----------------------------------------------|---|----------|-------|-----------|----------|----------|-------|------------------------------------------------|
| 125 | luteolin                                     | + | 3.45E+05 | 11.31 | C15H10O6  | 287.055  | 287.0552 | 0.58  | Trichosanthis fructus                          |
| 126 | eugenol                                      | + | 8.02E+06 | 11.31 | C10H12O2  | 165.091  | 165.0906 | -2.35 | Cinnamomi ramulus/Magnoliae officinalis cortex |
| 127 | hesperidin                                   | - | 4.39E+09 | 11.32 | C28H34O15 | 609.1825 | 609.1827 | 0.31  | Aurantii fructus immaturus                     |
| 128 | diosmetin-7-O- $\beta$ -D-glucoside          | + | 3.84E+06 | 11.33 | C22H22O11 | 463.1235 | 463.1227 | -1.62 | Trichosanthis fructus                          |
| 129 | hesperitin-7-O- $\beta$ -D-glucoside         | + | 2.12E+08 | 11.33 | C22H24O11 | 465.1391 | 465.1386 | -1.14 | Aurantii fructus immaturus                     |
| 130 | dihydroxy-trimethoxy-flavone                 | + | 3.37E+07 | 11.33 | C18H16O7  | 345.0969 | 345.0964 | -1.46 | Aurantii fructus immaturus                     |
| 131 | homoeriodictyol                              | + | 1.60E+09 | 11.33 | C16H14O6  | 303.0863 | 303.0858 | -1.63 | Aurantii fructus immaturus                     |
| 132 | isosakuranin                                 | + | 2.81E+08 | 11.33 | C22H24O10 | 449.1442 | 449.1437 | -1.21 | Aurantii fructus immaturus                     |
| 133 | 4',6-dihydroxy-4-methoxyisoaurone            | + | 1.03E+06 | 11.35 | C16H12O5  | 285.0758 | 285.0747 | -3.77 | Trichosanthis fructus                          |
| 134 | ehletianol C                                 | - | 3.65E+05 | 11.57 | C30H36O10 | 555.2236 | 555.2241 | 0.99  | Trichosanthis fructus                          |
| 135 | 4-allyl-2-(2'-methylbenzofuran-5'-yl) phenol | + | 1.65E+06 | 11.77 | C18H16O2  | 265.1223 | 265.1223 | -0.1  | Magnoliae officinalis cortex                   |
| 136 | lirinidine                                   | + | 6.15E+06 | 11.77 | C18H19NO2 | 282.1489 | 282.1488 | -0.31 | Magnoliae officinalis cortex                   |
| 137 | roemerine                                    | + | 4.12E+06 | 11.77 | C18H17NO2 | 280.1332 | 280.1332 | -0.11 | Magnoliae officinalis cortex                   |

|     |                                                                                                 |   |          |       |           |          |          |       |                              |
|-----|-------------------------------------------------------------------------------------------------|---|----------|-------|-----------|----------|----------|-------|------------------------------|
| 138 | (7aS)-7-Methyl-6, 7, 7a, 8-tetrahydro-5H- [1, 3] benzo dioxolo [6, 5, 4-de] benzo [g] quinoline | + | 4.12E+06 | 11.77 | C18H17NO2 | 280.1332 | 280.1332 | -0.11 | Magnoliae officinalis cortex |
|-----|-------------------------------------------------------------------------------------------------|---|----------|-------|-----------|----------|----------|-------|------------------------------|

**Continued Table S1: Identification of chemical constituents of TTN by UPLC-UESI-Q Exactive Focus**

| No. | Compound Name                                 | +/- | Area     | RT<br>(time) | Formula   | Expected<br>(m/z) | Measured<br>(m/z) | Delta<br>(m/z) | Source                                              |
|-----|-----------------------------------------------|-----|----------|--------------|-----------|-------------------|-------------------|----------------|-----------------------------------------------------|
| 139 | chinenoside V                                 | +   | 6.16E+05 | 11.87        | C45H72O19 | 917.4741          | 917.4709          | -3.46          | Allii macrostemonis bulbus                          |
| 140 | apigenin                                      | +   | 4.30E+05 | 12.05        | C15H10O5  | 271.0601          | 271.0589          | -4.54          | Trichosanthis fructus/Aurantii fructus<br>immaturus |
| 141 | rhoifolin                                     | -   | 1.88E+07 | 12.07        | C27H30O14 | 577.1563          | 577.1568          | 0.9            | Aurantii fructus immaturus                          |
| 142 | quercetin                                     | +   | 1.15E+05 | 12.18        | C15H10O7  | 303.0499          | 303.0501          | 0.49           | Trichosanthis fructus                               |
| 143 | anonaine                                      | +   | 2.94E+07 | 12.21        | C17H15NO2 | 266.1176          | 266.1174          | -0.6           | Magnoliae officinalis cortex                        |
| 144 | sinapaldehyde-4-O- $\beta$ -D-glucopyranoside | -   | 1.99E+06 | 12.25        | C17H22O9  | 369.1191          | 369.1194          | 0.74           | Magnoliae officinalis cortex                        |
| 145 | cadinol                                       | +   | 7.02E+05 | 12.31        | C20H20O6  | 357.1333          | 357.1332          | -0.14          | Magnoliae officinalis cortex                        |
| 146 | isorhamnetin-3-O- $\beta$ -D-glucoside        | -   | 4.49E+06 | 12.4         | C22H22O12 | 477.1038          | 477.104           | 0.32           | Magnoliae officinalis cortex                        |
| 147 | meranzin                                      | +   | 3.85E+07 | 12.47        | C15H16O4  | 261.1121          | 261.1118          | -1.36          | Aurantii fructus immaturus                          |

|     |                                             |   |          |       |           |          |          |       |                              |
|-----|---------------------------------------------|---|----------|-------|-----------|----------|----------|-------|------------------------------|
| 148 | cinnamaldehyde                              | + | 8.40E+07 | 12.59 | C9H8O     | 133.0648 | 133.0648 | 0.34  | Cinnamomi ramulus            |
| 149 | bergaptol                                   | - | 1.81E+07 | 12.76 | C11H6O4   | 201.0193 | 201.0191 | -1.2  | Aurantii fructus immaturus   |
| 150 | xanthotoxol                                 | - | 1.81E+07 | 12.76 | C11H6O4   | 201.0193 | 201.0191 | -1.2  | Aurantii fructus immaturus   |
| 151 | poriferast-5-ene-3 $\beta$ ,4 $\beta$ -diol | + | 9.24E+04 | 12.9  | C35H54O10 | 635.379  | 635.3761 | -4.52 | Trichosanthis fructus        |
| 152 | 7-O-6'' -Malonylnaringin                    | + | 4.91E+05 | 12.9  | C30H33O17 | 666.179  | 666.1781 | -1.43 | Aurantii fructus immaturus   |
| 153 | poncirin                                    | + | 7.46E+07 | 12.93 | C28H34O14 | 595.2021 | 595.2017 | -0.79 | Aurantii fructus immaturus   |
| 154 | sakuranetin                                 | + | 3.34E+07 | 12.93 | C16H14O5  | 287.0914 | 287.0909 | -1.7  | Aurantii fructus immaturus   |
| 155 | isosakuranetin                              | + | 3.34E+07 | 12.93 | C16H14O5  | 287.0914 | 287.0909 | -1.7  | Aurantii fructus immaturus   |
| 156 | magnaldehyde C                              | - | 6.81E+05 | 12.97 | C18H18O5  | 313.1082 | 313.1087 | 1.67  | Magnoliae officinalis cortex |
| 157 | cucurbitacin D                              | + | 1.07E+05 | 13.06 | C30H44O7  | 517.316  | 517.3157 | -0.47 | Trichosanthis fructus        |
| 158 | limonin                                     | + | 2.37E+08 | 13.31 | C26H30O8  | 471.2013 | 471.2007 | -1.26 | Aurantii fructus immaturus   |
| 159 | magnatriol B                                | - | 3.70E+07 | 13.34 | C15H14O3  | 241.087  | 241.087  | -0.25 | Magnoliae officinalis cortex |

**Continued Table S1: Identification of chemical constituents of TTN by UPLC-UESI-Q Exactive Focus**

| No. | Compound Name | +/- | Area | RT | Formula | Expected | Measured | Delta | Source |
|-----|---------------|-----|------|----|---------|----------|----------|-------|--------|
|-----|---------------|-----|------|----|---------|----------|----------|-------|--------|

|     |                                                 |   |          | (time) |            | (m/z)    | (m/z)    | (m/z) |                              |
|-----|-------------------------------------------------|---|----------|--------|------------|----------|----------|-------|------------------------------|
| 160 | randaiol                                        | - | 3.70E+07 | 13.34  | C15H14O3   | 241.087  | 241.087  | -0.25 | Magnoliae officinalis cortex |
| 161 | $\alpha$ -spinasterol-3-O- $\beta$ -D-glucoside | + | 3.38E+07 | 13.49  | C35H58O6   | 575.4306 | 575.4329 | 3.9   | Trichosanthis fructus        |
| 162 | alpha-Spinasterol glucoside                     | + | 3.38E+07 | 13.49  | C35H58O6   | 575.4306 | 575.4329 | 3.9   | Trichosanthis fructus        |
| 163 | magnolignan E                                   | - | 5.81E+06 | 13.63  | C18H18O4   | 297.1132 | 297.1137 | 1.51  | Magnoliae officinalis cortex |
| 164 | magnolignan A                                   | - | 4.29E+06 | 13.76  | C18H20O4   | 299.1289 | 299.1294 | 1.72  | Magnoliae officinalis cortex |
| 165 | 3-(2-Methoxyphenyl)acrylaldehyde                | + | 1.66E+08 | 13.95  | C10H10O2   | 163.0754 | 163.0752 | -1.1  | Cinnamomi ramulus            |
| 166 | benzenepropanal                                 | + | 1.58E+07 | 13.95  | C9H10O     | 135.0804 | 135.0804 | -0.31 | Cinnamomi ramulus            |
| 167 | methoxycinnamaldehyde                           | + | 1.66E+08 | 13.95  | C10H10O2   | 163.0754 | 163.0752 | -1.1  | Cinnamomi ramulus            |
| 168 | cucurbitacin E                                  | + | 6.26E+05 | 14.18  | C32H44O8   | 557.3109 | 557.3087 | -4.01 | Trichosanthis fructus        |
| 169 | yellow powder                                   | + | 3.09E+06 | 14.21  | C17H12N2O4 | 309.087  | 309.0869 | -0.41 | Trichosanthis fructus        |
| 170 | clovanemagnolol                                 | + | 1.24E+06 | 14.24  | C33H42O3   | 487.3207 | 487.3222 | 3.21  | Magnoliae officinalis cortex |
| 171 | caryolanemagnolol                               | + | 1.24E+06 | 14.24  | C33H42O3   | 487.3207 | 487.3222 | 3.21  | Magnoliae officinalis cortex |
| 172 | piperitenone                                    | + | 5.34E+05 | 14.31  | C10H14O    | 151.1117 | 151.1117 | 0     | Magnoliae officinalis cortex |

|     |                                        |   |          |       |            |          |          |       |                              |
|-----|----------------------------------------|---|----------|-------|------------|----------|----------|-------|------------------------------|
| 173 | opercurins A                           | - | 4.81E+05 | 14.61 | C38H56O13  | 719.3648 | 719.3661 | 1.78  | Trichosanthis fructus        |
| 174 | liriodenine                            | + | 5.41E+06 | 14.73 | C17H9NO3   | 276.0655 | 276.0654 | -0.55 | Magnoliae officinalis cortex |
| 175 | oxoushinsunine                         | + | 5.41E+06 | 14.73 | C17H9NO3   | 276.0655 | 276.0654 | -0.55 | Magnoliae officinalis cortex |
| 176 | bergapten                              | + | 1.58E+06 | 14.73 | C12H8O4    | 217.0495 | 217.0497 | 0.52  | Aurantii fructus immaturus   |
| 177 | 1-acetyl-3-carboxy- $\beta$ -carboline | + | 3.00E+05 | 14.99 | C14H10N2O3 | 255.0764 | 255.0763 | -0.43 | Trichosanthis fructus        |
| 178 | 23, 24-dihydrocucurbitacin D           | - | 4.15E+05 | 15    | C30H46O7   | 517.3171 | 517.3174 | 0.59  | Trichosanthis fructus        |
| 179 | lunularic acid                         | - | 6.67E+05 | 15.08 | C15H14O4   | 257.0819 | 257.0821 | 0.63  | Allii macrostemonis bulbus   |
| 180 | marmin                                 | + | 1.34E+06 | 15.3  | C19H24O5   | 333.1696 | 333.1693 | -0.92 | Aurantii fructus immaturus   |
| 181 | trimehydroxy-trimethoxy-flavone        | + | 2.93E+05 | 15.35 | C18H16O8   | 361.0918 | 361.0915 | -0.83 | Aurantii fructus immaturus   |

**Continued Table S1: Identification of chemical constituents of TTN by UPLC-UESI-Q Exactive Focus**

| No. | Compound Name  | +/- | Area     | RT<br>(time) | Formula  | Expected<br>(m/z) | Measured<br>(m/z) | Delta<br>(m/z) | Source                       |
|-----|----------------|-----|----------|--------------|----------|-------------------|-------------------|----------------|------------------------------|
| 182 | magnaldehyde D | -   | 6.71E+06 | 15.46        | C16H14O3 | 253.087           | 253.0872          | 0.73           | Magnoliae officinalis cortex |
| 183 | magnaldehyde E | -   | 6.71E+06 | 15.46        | C16H14O3 | 253.087           | 253.0872          | 0.73           | Magnoliae officinalis cortex |

|     |                          |   |          |       |           |           |           |       |                                                     |
|-----|--------------------------|---|----------|-------|-----------|-----------|-----------|-------|-----------------------------------------------------|
| 184 | chrysoeriol              | - | 2.92E+06 | 15.62 | C16H12O6  | 299.0561  | 299.0565  | 1.37  | Trichosanthis fructus                               |
| 185 | diosmetin                | - | 2.92E+06 | 15.62 | C16H12O6  | 299.0561  | 299.0565  | 1.37  | Trichosanthis fructus/Aurantii fructus<br>immaturus |
| 186 | blumenol A               | + | 8.81E+06 | 15.86 | C13H20O3  | 225.1485  | 225.1484  | -0.43 | Magnoliae officinalis cortex                        |
| 187 | O-methyleugenol          | + | 2.91E+06 | 16.12 | C11H14O2  | 179.1067  | 179.1067  | 0.42  | Magnoliae officinalis cortex                        |
| 188 | imperatorin              | + | 1.34E+06 | 16.22 | C16H14O4  | 271.0965  | 271.0963  | -0.88 | Aurantii fructus immaturus                          |
| 189 | blumenol B               | + | 4.97E+06 | 16.29 | C13H22O3  | 227.1642  | 227.1641  | -0.47 | Magnoliae officinalis cortex                        |
| 190 | magnaldehyde B           | - | 9.68E+06 | 16.43 | C18H16O3  | 279.1027  | 279.1031  | 1.39  | Magnoliae officinalis cortex                        |
| 191 | randainal                | - | 9.68E+06 | 16.43 | C18H16O3  | 279.1027  | 279.1031  | 1.39  | Magnoliae officinalis cortex                        |
| 192 | chinenoside IV           | - | 2.26E+06 | 16.58 | C50H80O23 | 1047.5018 | 1047.4993 | -2.38 | Allii macrostemonis bulbus                          |
| 193 | linalyl acetate          | - | 1.01E+07 | 16.76 | C12H20O2  | 195.139   | 195.1387  | -2.02 | Magnoliae officinalis cortex                        |
| 194 | bornyl acetate           | - | 1.01E+07 | 16.76 | C12H20O2  | 195.139   | 195.1387  | -2.02 | Magnoliae officinalis cortex                        |
| 195 | 4'-methoxymagnaldehyde B | - | 3.26E+05 | 17.09 | C19H18O3  | 293.1183  | 293.1187  | 1.34  | Magnoliae officinalis cortex                        |
| 196 | agarofuran               | + | 2.13E+06 | 17.15 | C15H24O   | 221.19    | 221.19    | 0.26  | Magnoliae officinalis cortex                        |

|     |                                            |   |          |       |            |          |          |       |                            |
|-----|--------------------------------------------|---|----------|-------|------------|----------|----------|-------|----------------------------|
| 197 | laxogenin                                  | + | 1.41E+05 | 17.15 | C27H42O4   | 431.3156 | 431.3161 | 1.11  | Allii macrostemonis bulbus |
| 198 | nobiletin                                  | + | 5.76E+08 | 17.41 | C21H22O8   | 403.1387 | 403.1383 | -1.08 | Aurantii fructus immaturus |
| 199 | 3', 4', 3, 5, 6, 7, 8-Heptamethoxy-flavone | + | 3.77E+08 | 17.61 | C22H24O9   | 433.1493 | 433.1488 | -1.17 | Aurantii fructus immaturus |
| 200 | trichosanatin                              | + | 1.14E+05 | 17.86 | C27H28N2O4 | 445.2122 | 445.2119 | -0.6  | Trichosanthis fructus      |
| 201 | 5, 6, 7, 4'-Tetramethoxyflavone            | + | 8.17E+07 | 17.89 | C19H18O6   | 343.1176 | 343.1174 | -0.7  | Aurantii fructus immaturus |
| 202 | isoimperatorin                             | - | 4.49E+06 | 17.93 | C16H14O4   | 269.0819 | 269.0824 | 1.62  | Aurantii fructus immaturus |

**Continued Table S1: Identification of chemical constituents of TTN by UPLC-UESI-Q Exactive Focus**

| No. | Compound Name                          | +/- | Area     | RT<br>(time) | Formula  | Expected<br>(m/z) | Measured<br>(m/z) | Delta<br>(m/z) | Source                       |
|-----|----------------------------------------|-----|----------|--------------|----------|-------------------|-------------------|----------------|------------------------------|
| 203 | paeonol                                | +   | 9.97E+06 | 18.02        | C9H10O3  | 167.0703          | 167.0703          | 0.25           | Trichosanthis fructus        |
| 204 | 7(Z),10(Z),13(Z)-hexadecatrienoic acid | +   | 2.89E+05 | 18.09        | C16H26O2 | 251.2006          | 251.1995          | -4.25          | Trichosanthis fructus        |
| 205 | caryophyllene                          | +   | 2.31E+07 | 18.09        | C15H24   | 205.1951          | 205.195           | -0.21          | Magnoliae officinalis cortex |
| 206 | tangeretin                             | +   | 4.27E+08 | 18.82        | C20H20O7 | 373.1282          | 373.1277          | -1.16          | Aurantii fructus immaturus   |
| 207 | gitogenin                              | +   | 3.56E+05 | 18.9         | C27H44O4 | 433.3312          | 433.3305          | -1.62          | Allii macrostemonis bulbus   |

|     |                           |   |          |       |           |          |          |       |                              |
|-----|---------------------------|---|----------|-------|-----------|----------|----------|-------|------------------------------|
| 208 | magnolignan G             | - | 6.90E+04 | 19.79 | C36H36O8  | 595.2337 | 595.2346 | 1.48  | Magnoliae officinalis cortex |
| 209 | obovatoI                  | - | 3.34E+07 | 20.12 | C18H18O3  | 281.1183 | 281.1186 | 1.07  | Magnoliae officinalis cortex |
| 210 | magnolol                  | - | 3.84E+08 | 20.45 | C18H18O2  | 265.1234 | 265.1236 | 0.62  | Magnoliae officinalis cortex |
| 211 | 4'-methoxymagnodialdehyde | + | 3.68E+05 | 20.81 | C19H16O4  | 309.1121 | 309.1119 | -0.65 | Magnoliae officinalis cortex |
| 212 | geranylacetone            | + | 7.16E+05 | 21.29 | C13H22O   | 195.1743 | 195.1744 | 0.19  | Trichosanthis fructus        |
| 213 | punicic acid              | + | 5.30E+06 | 22.72 | C18H30O2  | 279.2319 | 279.2317 | -0.72 | Trichosanthis fructus        |
| 214 | linolenic acid            | + | 5.30E+06 | 22.72 | C18H30O2  | 279.2319 | 279.2317 | -0.72 | Allii macrostemonis bulbus   |
| 215 | auraptene                 | + | 3.31E+05 | 23.57 | C19H22O3  | 299.1642 | 299.1637 | -1.58 | Aurantii fructus immaturus   |
| 216 | tigogenin                 | + | 2.23E+05 | 23.65 | C27H44O3  | 417.3363 | 417.3358 | -1.14 | Allii macrostemonis bulbus   |
| 217 | magnoflorine              | + | 7.05E+04 | 25.13 | C19H24NO3 | 315.1829 | 315.1842 | 4.23  | Magnoliae officinalis cortex |
| 218 | magnocurarine             | + | 7.05E+04 | 25.13 | C19H24NO3 | 315.1829 | 315.1842 | 4.23  | Magnoliae officinalis cortex |
| 219 | tianshic acid             | + | 3.20E+08 | 25.75 | C18H34O5  | 331.2479 | 331.2477 | -0.66 | Trichosanthis fructus        |
| 220 | palmitoleic acid          | - | 7.33E+04 | 26.65 | C16H30O2  | 253.2173 | 253.2172 | -0.48 | Trichosanthis fructus        |
| 221 | isosalsoline              | + | 2.09E+07 | 26.86 | C18H32O   | 265.2526 | 265.2522 | -1.48 | Magnoliae officinalis cortex |

|     |                  |   |          |       |          |          |          |       |                                                     |
|-----|------------------|---|----------|-------|----------|----------|----------|-------|-----------------------------------------------------|
| 222 | 7-Hexadecyn-1-ol | + | 8.30E+05 | 26.93 | C16H30O  | 239.2369 | 239.2367 | -1.15 | Trichosanthis fructus                               |
| 223 | linoleic acid    | - | 9.30E+05 | 27.05 | C18H32O2 | 279.233  | 279.2333 | 1.39  | Trichosanthis fructus/Allii macrostemonis<br>bulbus |

**Continued Table S1: Identification of chemical constituents of TTN by UPLC-UESI-Q Exactive Focus**

| No. | Compound Name          | +/- | Area     | RT<br>(time) | Formula   | Expected<br>(m/z) | Measured<br>(m/z) | Delta<br>(m/z) | Source                                                                           |
|-----|------------------------|-----|----------|--------------|-----------|-------------------|-------------------|----------------|----------------------------------------------------------------------------------|
| 224 | piperitylmagnolol      | -   | 1.97E+06 | 27.43        | C28H34O2  | 401.2486          | 401.2489          | 0.83           | Magnoliae officinalis cortex                                                     |
| 225 | bornylmagnolol         | -   | 1.97E+06 | 27.43        | C28H34O2  | 401.2486          | 401.2489          | 0.83           | Magnoliae officinalis cortex                                                     |
| 226 | tembetarine            | +   | 1.29E+06 | 28.04        | C20H26NO4 | 345.1935          | 345.1928          | -1.88          | Magnoliae officinalis cortex                                                     |
| 227 | palmitic acid          | -   | 8.04E+06 | 28.05        | C16H32O2  | 255.233           | 255.2329          | -0.04          | Trichosanthis fructus/Magnoliae officinalis<br>cortex/Allii macrostemonis bulbus |
| 228 | oleic acid             | -   | 1.94E+07 | 28.05        | C18H34O2  | 281.2486          | 281.2487          | 0.53           | Trichosanthis fructus/Allii macrostemonis<br>bulbus/Magnoliae officinalis cortex |
| 229 | eudesobovatoI A        | +   | 6.33E+04 | 28.94        | C33H44O4  | 505.3312          | 505.3311          | -0.37          | Magnoliae officinalis cortex                                                     |
| 230 | cis-11-eicosenoic acid | -   | 3.12E+05 | 29.33        | C20H38O2  | 309.2799          | 309.2805          | 1.8            | Trichosanthis fructus                                                            |
